# Supplementary material for: Transcriptome profiling reveals links between ParS/ParR, MexEF-OprN, and quorum sensing in the regulation of adaptation and virulence in Pseudomonas aeruginosa
Source: PubMed Central journal article supplement (PMC3848899; doi:10.1186/1471-2164-14-618), 2013-09-13
Supplement: 1471-2164-14-618-S5.pdf [file 1471-2164-14-618-S5.pdf]

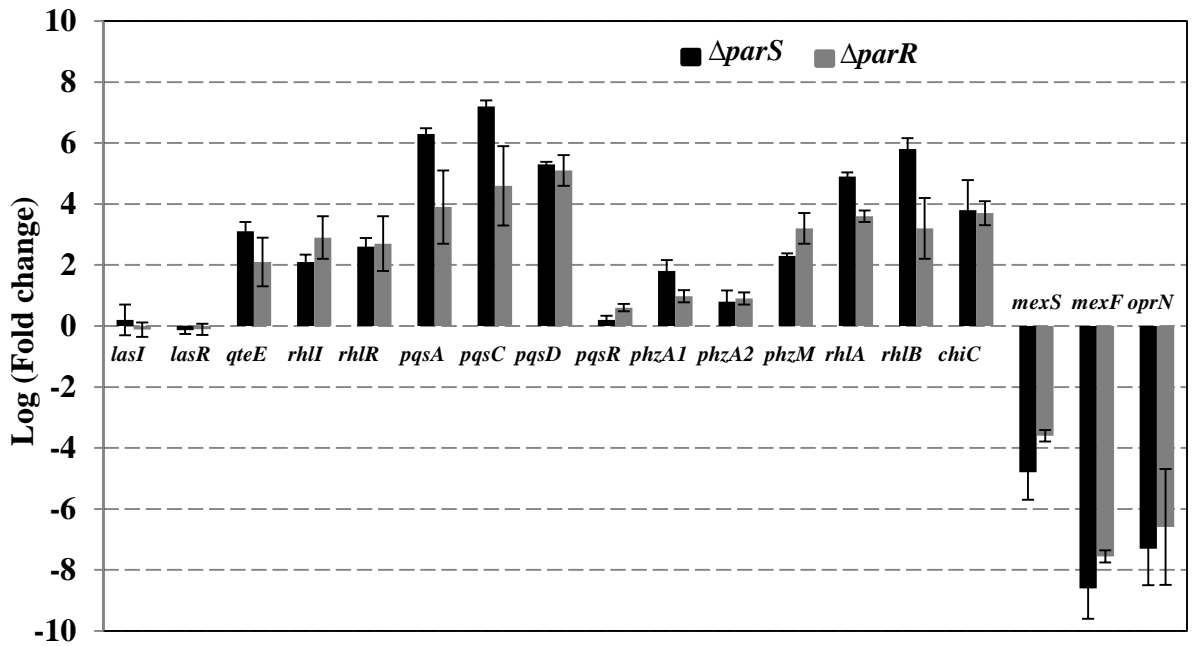

Wang et al., Supplementary Figure 2
